# Supplementary material for: Enhancing the adsorption–photocatalytic efficiency of BiOBr for Congo red degradation by tuning the surface charge and bandgap via an Y3+–I− co-doping strategy
Source: Royal Society of Chemistry journal article supplement (doi:10.1039/d4cp00876f), 2024-01-01
Supplement: d4cp00876f1.pdf [file d4cp00876f1.pdf]

## Electronic Supplementary Information

**Title: Enhancing adsorption-photocatalytic efficiency of BiOBr for Congo red degradation by tuning surface charge and bandgap via  $Y^{3+}$ - $I^-$  co-doping strategy**

**Authors and affiliations:**

Dongsheng Chen<sup>a</sup>, Keqian Gong<sup>b</sup>, Xiangyang Xu<sup>a, c, \*</sup>, Chenyu Huang<sup>a</sup>, Pengtao Lei<sup>a</sup>

a School of Minerals Processing and Bioengineering, Central South University, Changsha 410083, China

b. State Key Laboratory of New Ceramics and Fine Processing, Institute of Nuclear and New Energy Technology, Tsinghua University, Beijing, 100084, China

c Hunan Key Laboratory of Mineral Materials and Applications, Changsha 410083, China

**Corresponding author:** Xiangyang Xu (E-mail: [xuxiangyang@csu.edu.cn](mailto:xuxiangyang@csu.edu.cn))

This *Supplementary Material* file contains 12 figures showing SEM, XRD, TEM, FTIR, Adsorption-photodegradation and calculation results. Meanwhile, 11 relevant data tables were supplied.

**Figure captions:**

**Fig. S1.** Wide-field SEM images of BiOBr (a), Bi<sub>0.8</sub>Y<sub>0.20</sub>OBr (b), BiOBr<sub>0.97</sub>I<sub>0.03</sub> (c) and Bi<sub>0.8</sub>Y<sub>0.20</sub>OBr<sub>0.97</sub>I<sub>0.03</sub> (d).

**Fig. S2.** XRD patterns of Bi<sub>1-x</sub>Y<sub>x</sub>OBr (a), BiOBr<sub>1-y</sub>I<sub>y</sub> (b) and Bi<sub>0.8</sub>Y<sub>0.2</sub>OBr<sub>1-y</sub>I<sub>y</sub> (c).

**Fig. S3.** TEM visualization (top side view on flake surface) of pristine BiOBr (a) and Bi<sub>0.8</sub>Y<sub>0.2</sub>OBr<sub>0.97</sub>I<sub>0.03</sub> (b).

**Fig. S4.** SAED patterns of pristine BiOBr (a) and Bi<sub>0.8</sub>Y<sub>0.2</sub>OBr<sub>0.97</sub>I<sub>0.03</sub> (b).

**Fig. S5.** HRTEM visualization (sectional profile) of pristine BiOBr (a) and Bi<sub>0.8</sub>Y<sub>0.2</sub>OBr<sub>0.97</sub>I<sub>0.03</sub> (b).

**Fig. S6.** HRTEM and localized magnified fast Fourier transform images of pristine BiOBr (a, a1 and a2) showing orderly array and Bi<sub>0.8</sub>Y<sub>0.2</sub>OBr<sub>0.97</sub>I<sub>0.03</sub> (b, b1 and b2) displaying a defect-rich structure.

**Fig. S7.** COHP images of Bi<sub>0.8</sub>Y<sub>0.2</sub>OBr (a), BiOBr<sub>0.97</sub>I<sub>0.03</sub> (b) and Bi<sub>0.8</sub>Y<sub>0.2</sub>OBr<sub>0.97</sub>I<sub>0.03</sub> (c). The interactions between those atoms are described by the product of their corresponding Hamiltonian matrix element and the density of states matrix.

**Fig. S8.** FTIR spectra for bands over 4000-2700 cm<sup>-1</sup>(a) and 1800-400 cm<sup>-1</sup> (b) of BiOBr, Bi<sub>0.8</sub>Y<sub>0.2</sub>OBr, BiOBr<sub>0.97</sub>I<sub>0.03</sub>, Bi<sub>0.8</sub>Y<sub>0.2</sub>OBr<sub>0.97</sub>I<sub>0.03</sub> and PVP K30.

**Fig. S9.** FTIR spectra of CR.

**Fig. S10.** Adsorption-photodegradation curves and pseudo-first-order kinetic plots of Bi<sub>0.8</sub>Y<sub>0.2</sub>OBr<sub>1-y</sub>I<sub>y</sub> (initial CR solution: 100 mL, pH: 6, and catalyst dosage: 25 mg).

**Fig. S11.** Cycling performance of CR photodegradation for Bi<sub>0.8</sub>Y<sub>0.2</sub>OBr<sub>0.97</sub>I<sub>0.03</sub>.

**Fig. S12.** XRD patterns of the fresh and cycled Bi<sub>0.8</sub>Y<sub>0.2</sub>OBr<sub>0.97</sub>I<sub>0.03</sub>.

***Table captions:***

**Table S1.** BET special surface area, pore volume and modal pore size of pure BiOBr, Bi<sub>0.8</sub>Y<sub>0.2</sub>OBr, BiOBr<sub>0.97</sub>I<sub>0.03</sub> and Bi<sub>0.8</sub>Y<sub>0.2</sub>OBr<sub>0.97</sub>I<sub>0.03</sub>.

**Table S2.** Lattice constants of pristine and doped BiOBr samples based on Rietveld method.

**Table S3** Bond length of pristine and doped BiOBr structures.

**Table S4** Lattice constant and angle of pristine and doped BiOBr structures.

**Table S5.** Assignment of main FTIR peaks of PVP K30, pristine and doped BiOBr powders.

**Table S6.** Assignment of main FTIR peaks of CR.

**Table S7.** Calculated  $E_{fb}$ ,  $E_{CB}$  and  $E_{VB}$  values of BiOBr samples using Mott-Schottky equation.

**Table S8.** DFT calculated band structural results of pure and doped BiOBr flakes.

**Table S9.** Adsorption efficiency, photodegradation efficiency, first-order kinetic parameters for different samples (initial CR concentration: 50 mg L<sup>-1</sup>, CR solution: 50 mL, pH: 6, and catalyst dosage: 25 mg).

**Table S10.** TOC removal performance of Bi<sub>0.8</sub>Y<sub>0.2</sub>OBr<sub>0.97</sub>I<sub>0.03</sub> for the degradation of CR.

**Table S11.** Adsorption efficiency, photodegradation efficiency, first-order kinetic parameters for different samples (initial CR concentration: 100 mg L<sup>-1</sup>, CR solution: 50 mL, pH: 6, and catalyst dosage: 25 mg).

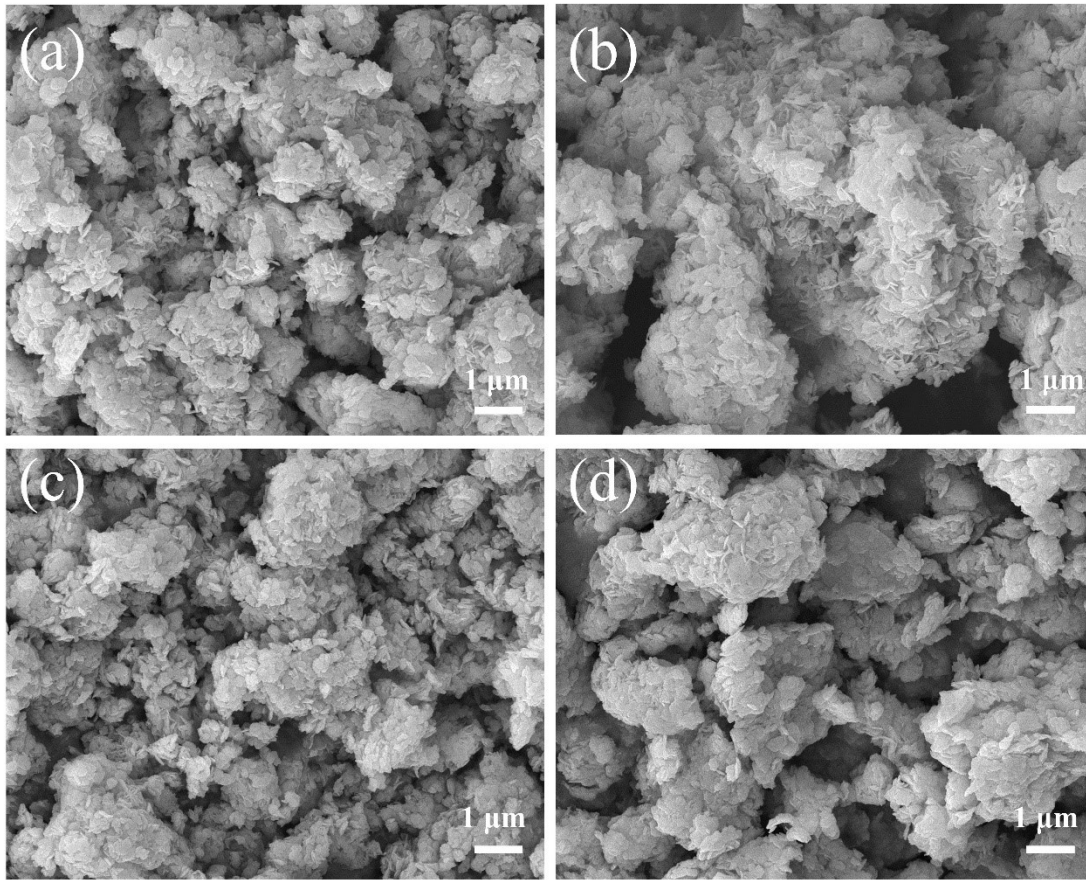

**Fig. S1.** Wide-field SEM images of BiOBr (a), Bi<sub>0.8</sub>Y<sub>0.2</sub>OBr (b), BiOBr<sub>0.97</sub>I<sub>0.03</sub> (c) and Bi<sub>0.8</sub>Y<sub>0.2</sub>OBr<sub>0.97</sub>I<sub>0.03</sub> (d).

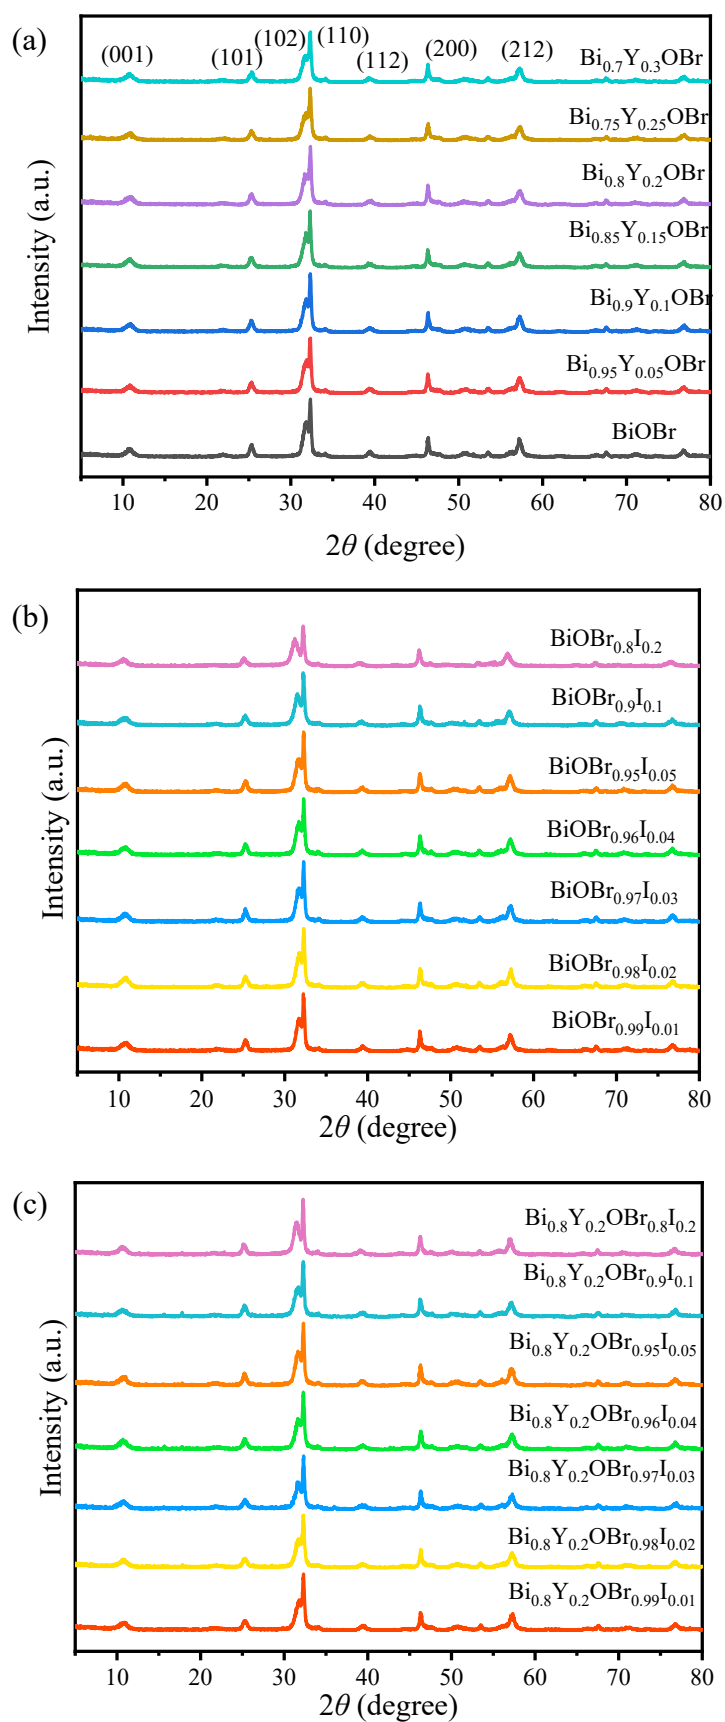

**Fig. S2.** XRD patterns of  $\text{Bi}_{1-x}\text{Y}_x\text{OBr}$  (a),  $\text{BiOBr}_{1-y}\text{I}_y$  (b) and  $\text{Bi}_{0.8}\text{Y}_{0.2}\text{OBr}_{1-y}\text{I}_y$  (c).

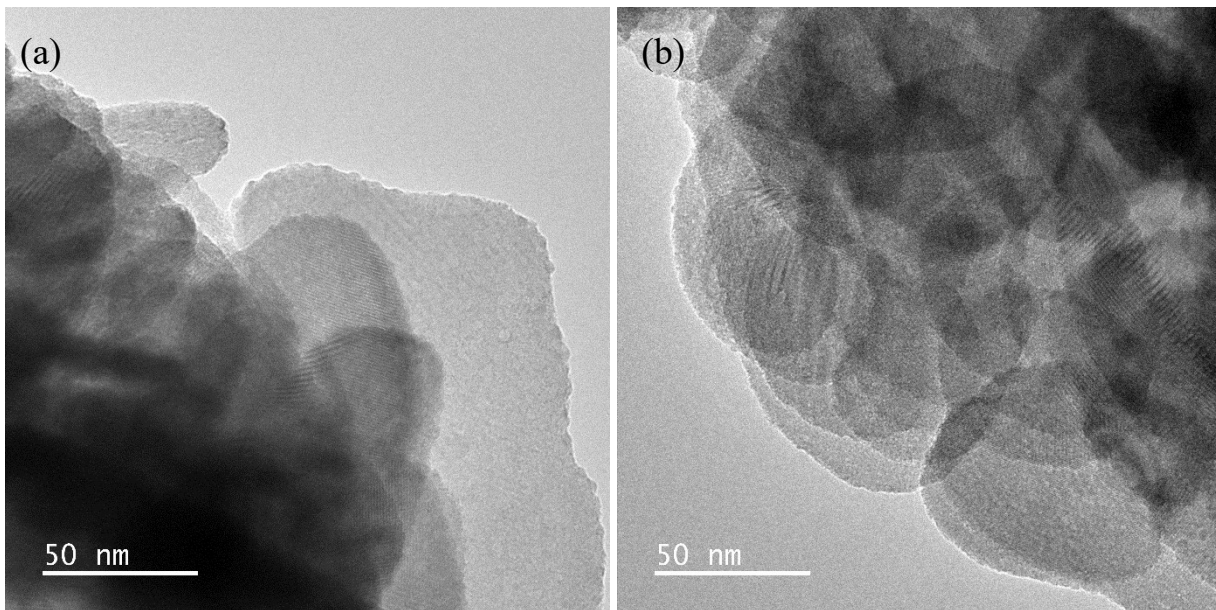

**Fig. S3.** TEM visualization (top side view on flake surface) of pristine BiOBr (a) and Bi<sub>0.8</sub>Y<sub>0.2</sub>OBr<sub>0.97</sub>I<sub>0.03</sub> (b).

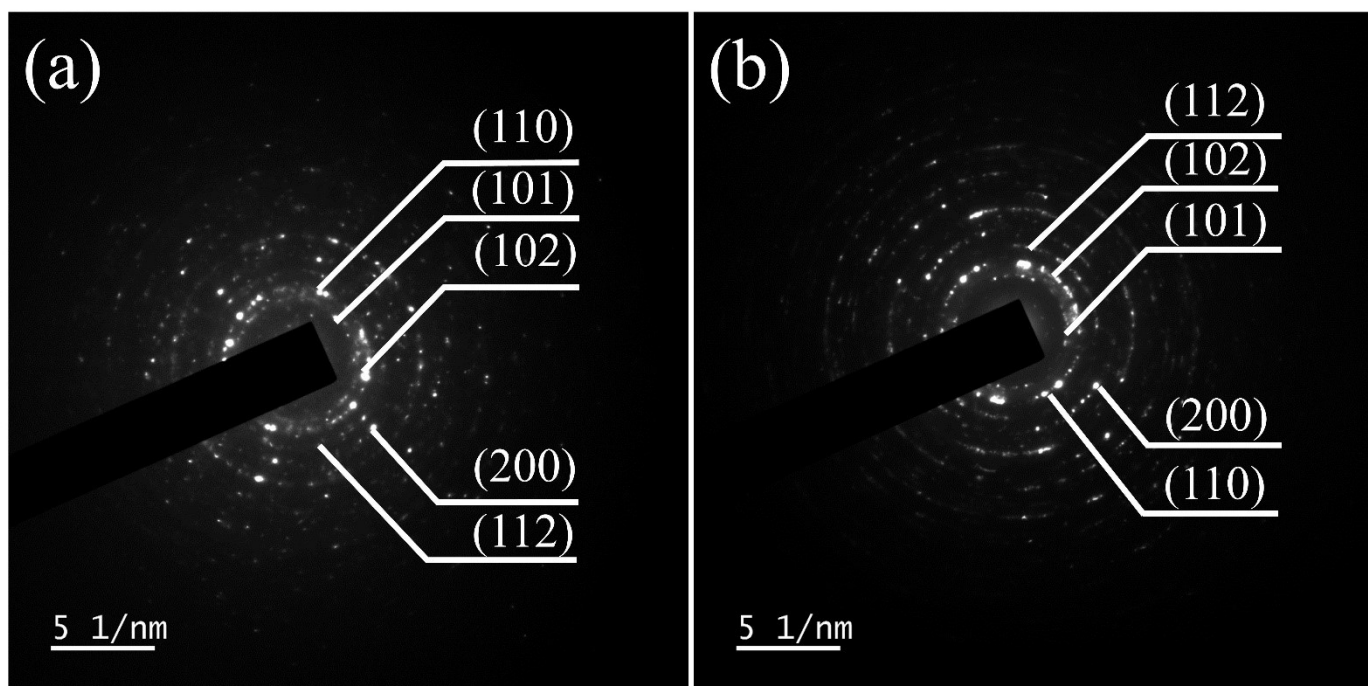

**Fig. S4.** SAED patterns of pristine BiOBr (a) and  $\text{Bi}_{0.8}\text{Y}_{0.2}\text{OBr}_{0.97}\text{I}_{0.03}$  (b).

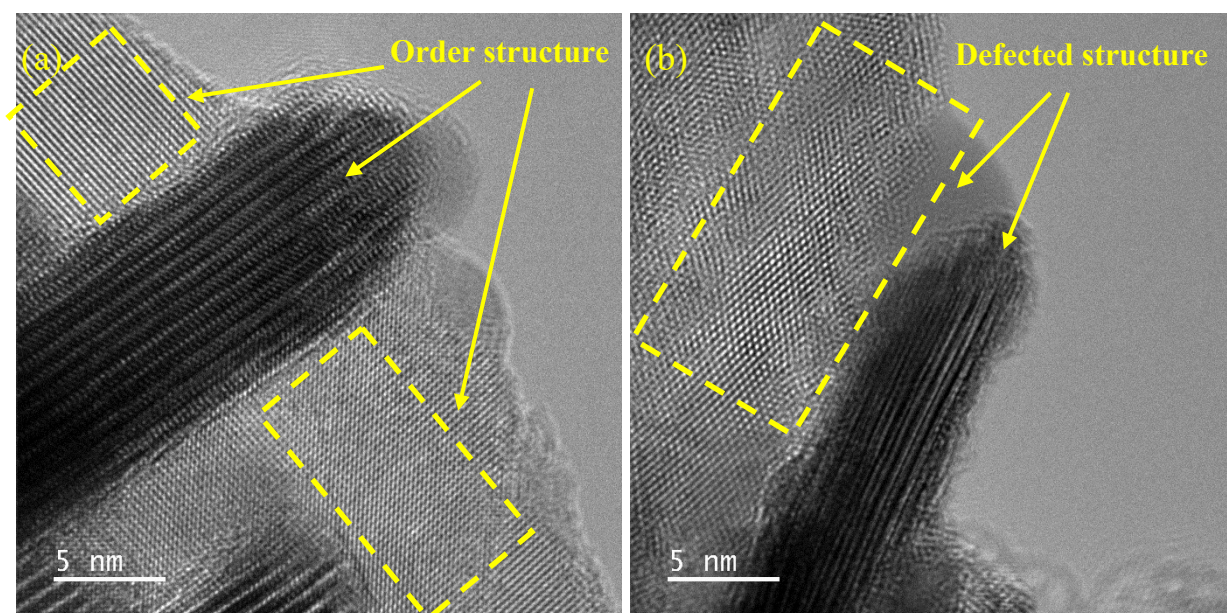

**Fig. S5.** HRTEM visualization (sectional profile) of pristine BiOBr (a) and Bi<sub>0.8</sub>Y<sub>0.2</sub>OBr<sub>0.97</sub>I<sub>0.03</sub> (b).



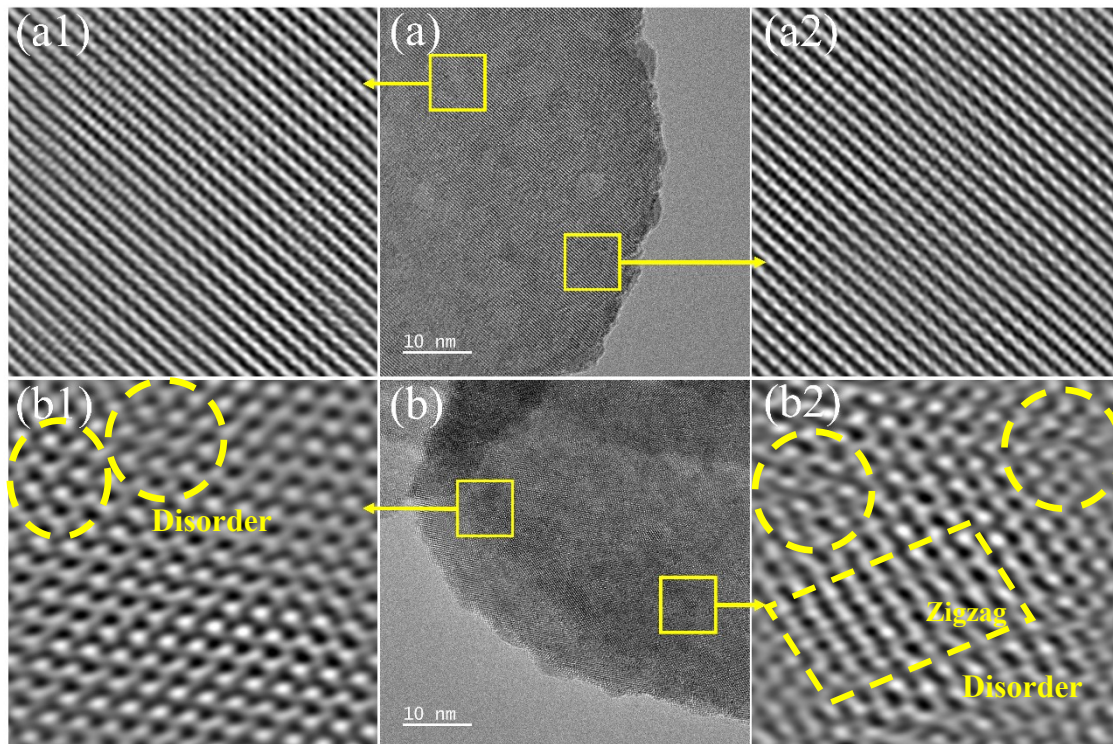

**Fig. S6.** HRTEM and localized magnified fast Fourier transform images of pristine BiOBr (a, a1 and a2) showing orderly array and Bi<sub>0.8</sub>Y<sub>0.2</sub>OBr<sub>0.97</sub>I<sub>0.03</sub> (b, b1 and b2) displaying a defect-rich structure.

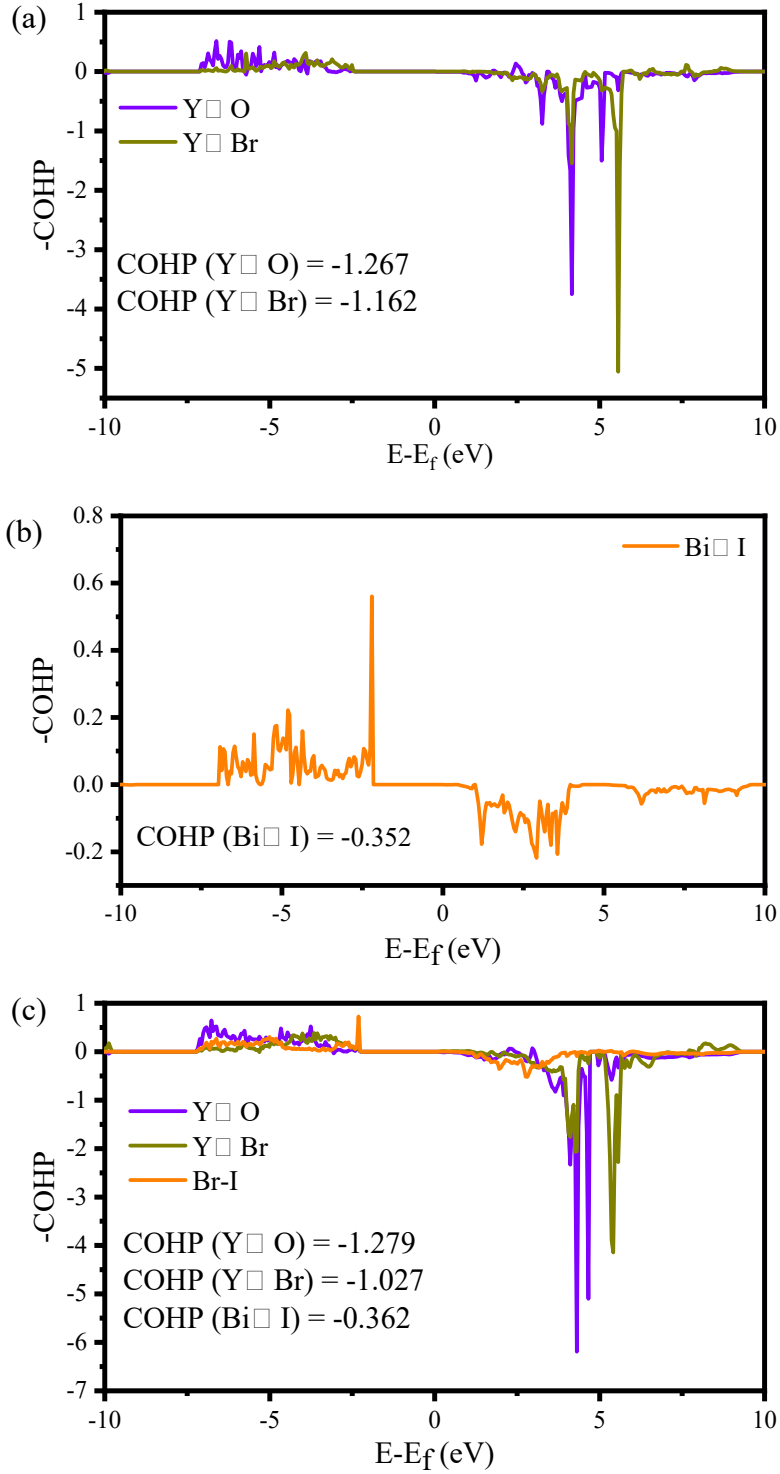

**Fig. S7.** COHP images of  $Bi_{0.8}Y_{0.2}OBr$  (a),  $BiOBr_{0.97}I_{0.03}$  (b) and  $Bi_{0.8}Y_{0.2}OBr_{0.97}I_{0.03}$  (c). The interactions between those atoms are described by the product of their corresponding Hamiltonian matrix element and the density of states matrix.

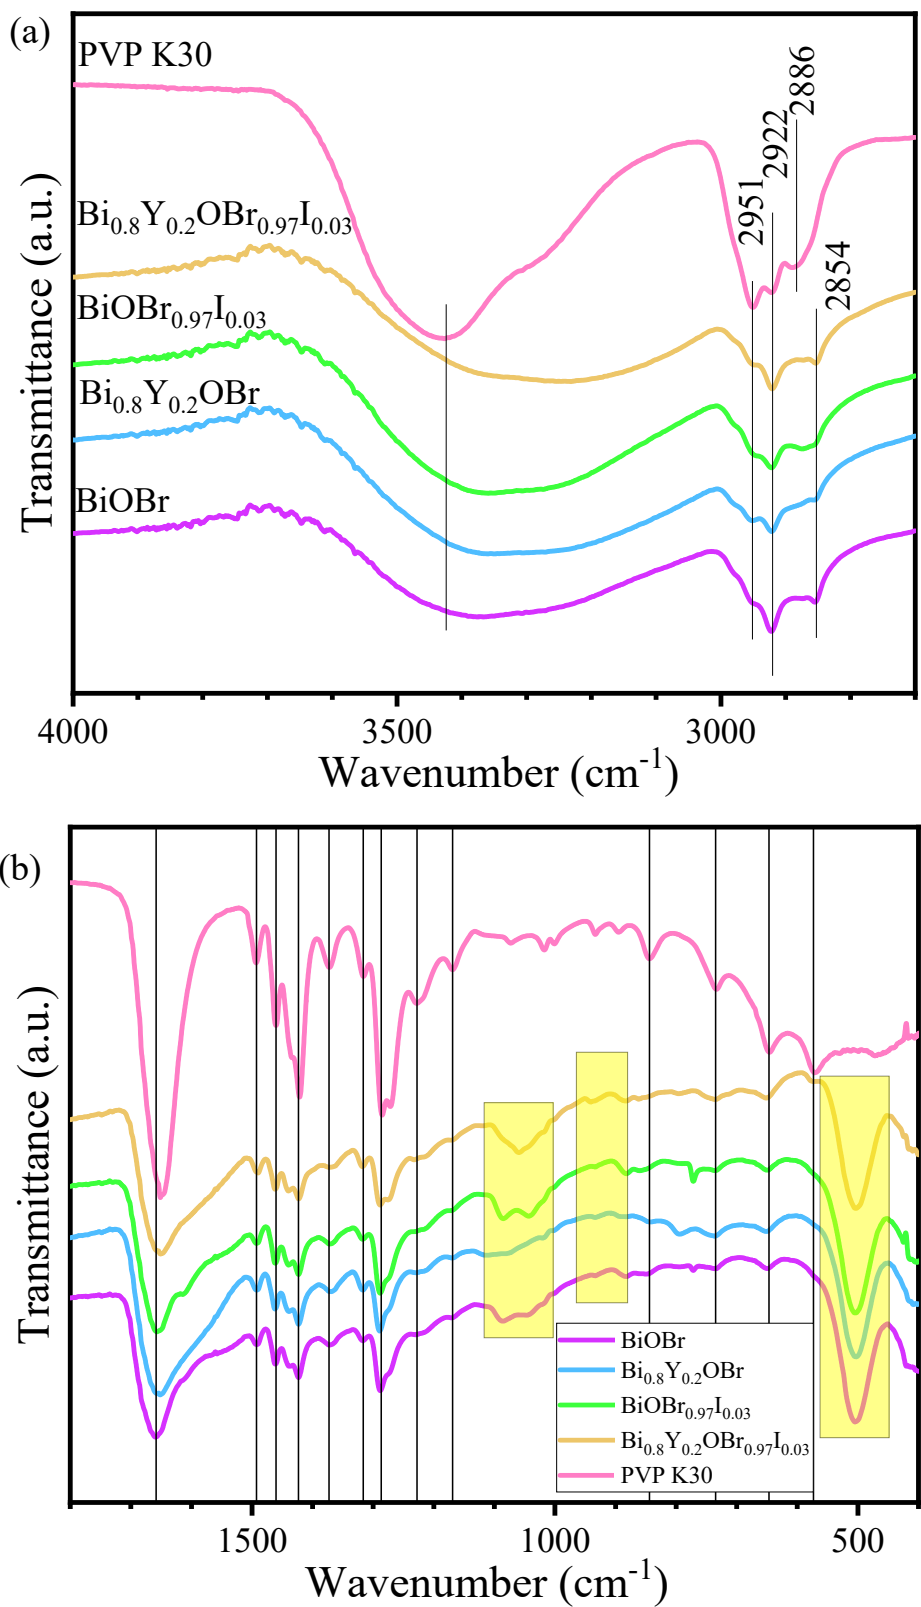

**Fig. S8.** FTIR spectra for bands over 4000-2700  $\text{cm}^{-1}$ (a) and 1800-400  $\text{cm}^{-1}$  (b) of  $\text{BiOBr}$ ,  $\text{Bi}_{0.8}\text{Y}_{0.2}\text{OBr}$ ,  $\text{BiOBr}_{0.97}\text{I}_{0.03}$ ,  $\text{Bi}_{0.8}\text{Y}_{0.2}\text{OBr}_{0.97}\text{I}_{0.03}$  and PVP K30.

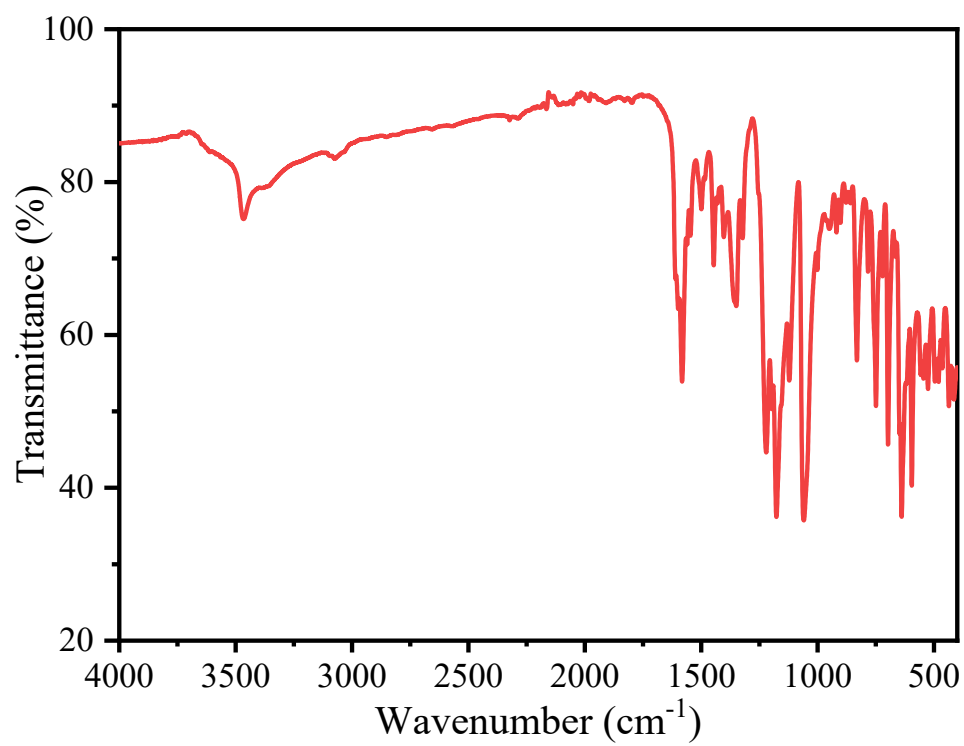

**Fig. S9.** FTIR spectra of CR.

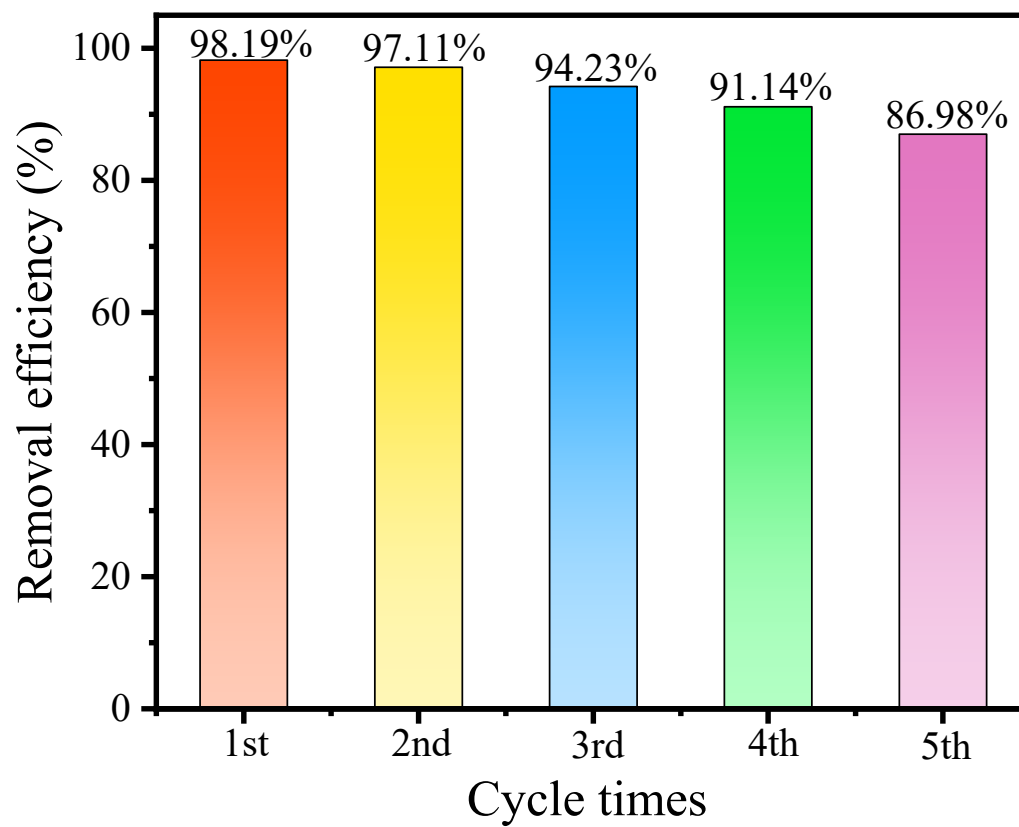

**Fig. S10.** Cycling performance of CR photodegradation for  $\text{Bi}_{0.8}\text{Y}_{0.2}\text{OBr}_{0.97}\text{I}_{0.03}$ .

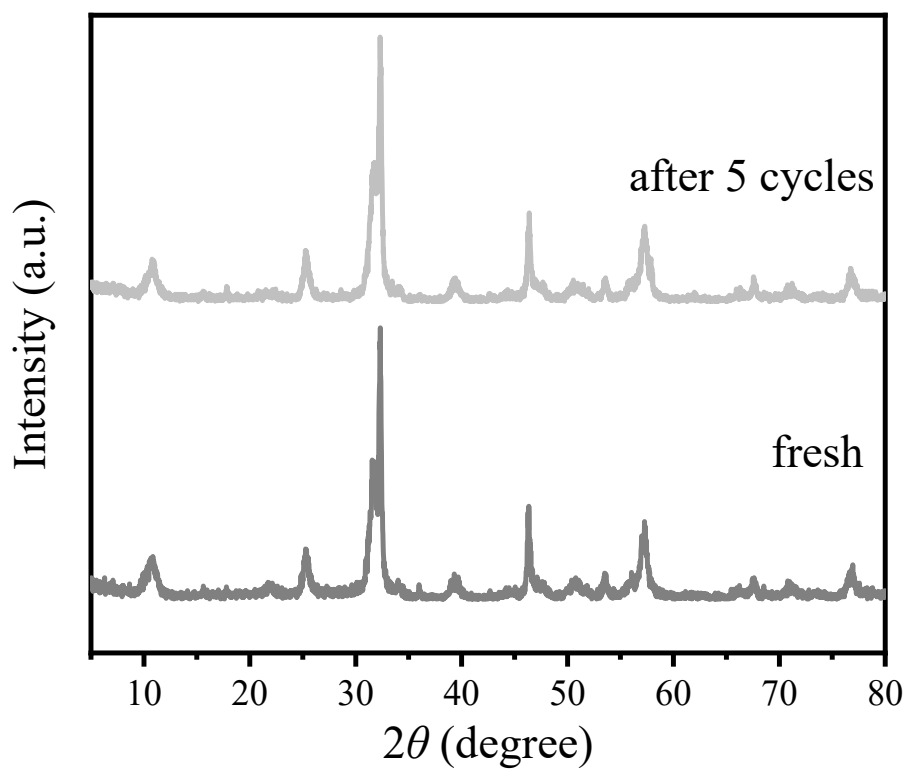

**Fig. S11.** XRD patterns of the fresh and cycled  $\text{Bi}_{0.8}\text{Y}_{0.2}\text{OBr}_{0.97}\text{I}_{0.03}$ .

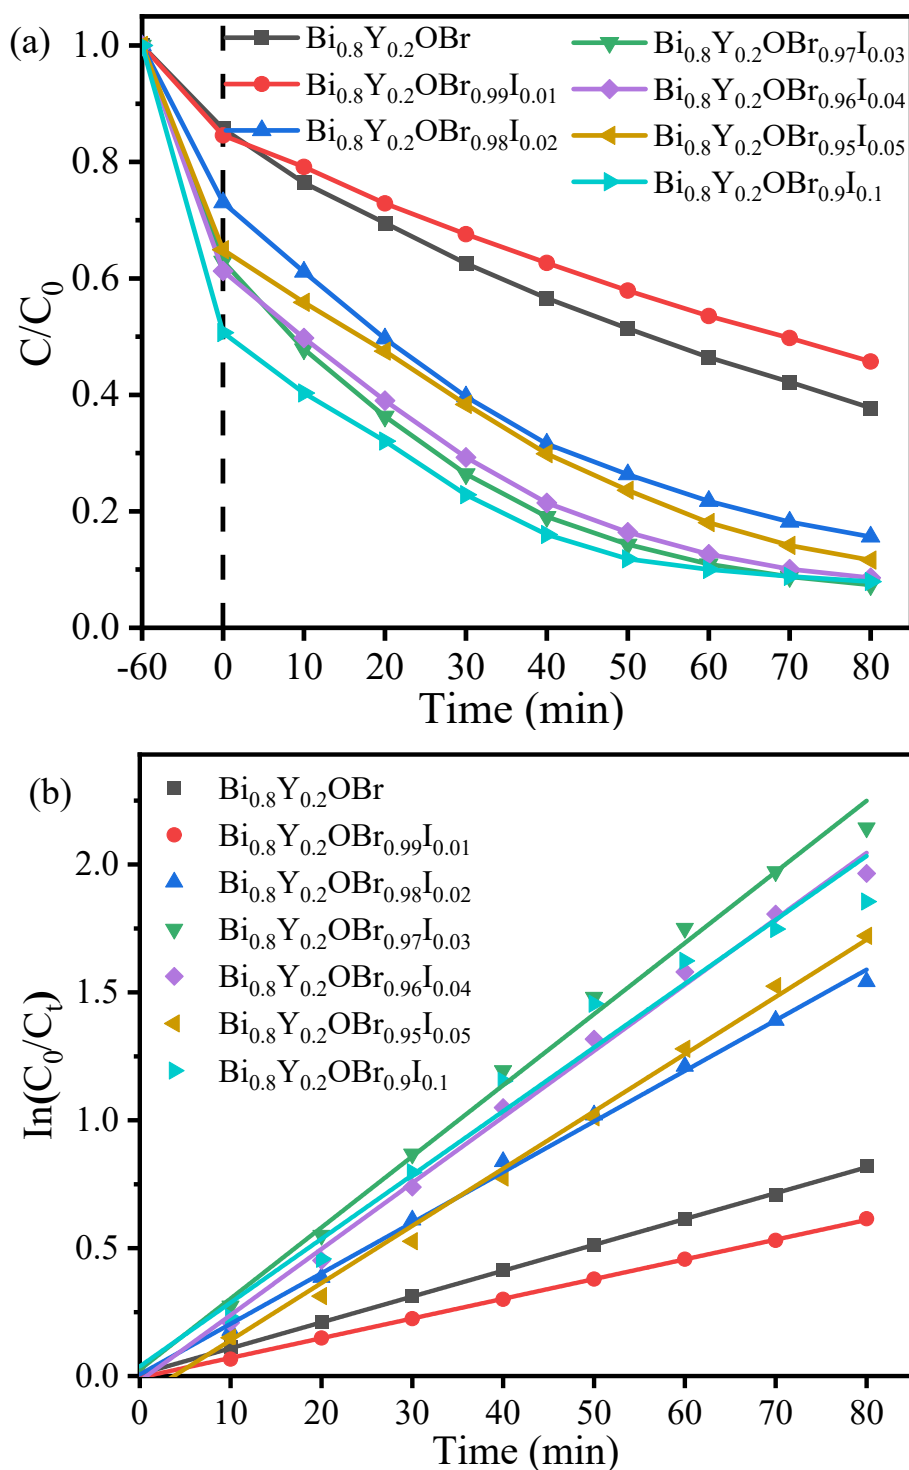

**Fig. S12.** Adsorption-photodegradation curves and pseudo-first-order kinetic plots of Bi<sub>0.8</sub>Y<sub>0.2</sub>OBr<sub>1-y</sub>I<sub>y</sub> (initial CR concentration: 100 mg L<sup>-1</sup>, solution volume: 50 mL, pH: 6, and catalyst dosage: 25 mg).

**Table S1** BET special surface area, pore volume and modal pore size of pure BiOBr, Bi<sub>0.8</sub>Y<sub>0.2</sub>OBr, BiOBr<sub>0.97</sub>I<sub>0.03</sub> and Bi<sub>0.8</sub>Y<sub>0.2</sub>OBr<sub>0.97</sub>I<sub>0.03</sub>.

| Samples                                                                  | S <sub>BET</sub> (m <sup>2</sup> g <sup>-1</sup> ) | Pore volume (cm <sup>3</sup> g <sup>-1</sup> ) | Modal pore diameter (nm) |
|--------------------------------------------------------------------------|----------------------------------------------------|------------------------------------------------|--------------------------|
| BiOBr                                                                    | 32.7069                                            | 0.242811                                       | 29.6954                  |
| Bi <sub>0.8</sub> Y <sub>0.2</sub> OBr                                   | 33.5234                                            | 0.265345                                       | 30.5459                  |
| BiOBr <sub>0.97</sub> I <sub>0.03</sub>                                  | 33.9161                                            | 0.228927                                       | 25.9945                  |
| Bi <sub>0.8</sub> Y <sub>0.2</sub> OBr <sub>0.97</sub> I <sub>0.03</sub> | 30.0059                                            | 0.196479                                       | 26.1920                  |



**Table S2** Lattice constants of pristine and doped BiOBr samples based on Rietveld method.

| Lattice constant (Å)                                                     | <i>a=b</i> | <i>c</i> |
|--------------------------------------------------------------------------|------------|----------|
| BiOBr                                                                    | 3.91985    | 8.09339  |
| Bi <sub>0.95</sub> Y <sub>0.05</sub> OBr                                 | 3.92506    | 8.11091  |
| Bi <sub>0.9</sub> Y <sub>0.1</sub> OBr                                   | 3.92444    | 8.1064   |
| Bi <sub>0.85</sub> Y <sub>0.15</sub> OBr                                 | 3.92369    | 8.0982   |
| Bi <sub>0.8</sub> Y <sub>0.2</sub> OBr                                   | 3.92282    | 8.09552  |
| Bi <sub>0.75</sub> Y <sub>0.25</sub> OBr                                 | 3.92187    | 8.09011  |
| Bi <sub>0.7</sub> Y <sub>0.3</sub> OBr                                   | 3.92095    | 8.08639  |
|                                                                          |            |          |
| BiOBr <sub>0.99</sub> I <sub>0.01</sub>                                  | 3.92052    | 8.12369  |
| BiOBr <sub>0.98</sub> I <sub>0.02</sub>                                  | 3.92387    | 8.12452  |
| BiOBr <sub>0.97</sub> I <sub>0.03</sub>                                  | 3.92429    | 8.1267   |
| BiOBr <sub>0.96</sub> I <sub>0.04</sub>                                  | 3.9257     | 8.1311   |
| BiOBr <sub>0.95</sub> I <sub>0.05</sub>                                  | 3.92765    | 8.13359  |
| BiOBr <sub>0.9</sub> I <sub>0.1</sub>                                    | 3.92836    | 8.20445  |
| BiOBr <sub>0.8</sub> I <sub>0.2</sub>                                    | 3.92909    | 8.41192  |
|                                                                          |            |          |
| Bi <sub>0.8</sub> Y <sub>0.2</sub> OBr <sub>0.99</sub> I <sub>0.01</sub> | 3.927      | 8.1151   |
| Bi <sub>0.8</sub> Y <sub>0.2</sub> OBr <sub>0.98</sub> I <sub>0.02</sub> | 3.92911    | 8.12311  |
| Bi <sub>0.8</sub> Y <sub>0.2</sub> OBr <sub>0.97</sub> I <sub>0.03</sub> | 3.93012    | 8.12843  |
| Bi <sub>0.8</sub> Y <sub>0.2</sub> OBr <sub>0.96</sub> I <sub>0.04</sub> | 3.93249    | 8.13555  |
| Bi <sub>0.8</sub> Y <sub>0.2</sub> OBr <sub>0.95</sub> I <sub>0.05</sub> | 3.93402    | 8.14834  |
| Bi <sub>0.8</sub> Y <sub>0.2</sub> OBr <sub>0.9</sub> I <sub>0.1</sub>   | 3.93255    | 8.19480  |
| Bi <sub>0.8</sub> Y <sub>0.2</sub> OBr <sub>0.8</sub> I <sub>0.2</sub>   | 3.92753    | 8.23199  |

**Table S3** Bond length of pristine and doped BiOBr structures.

| Sample                                                                   | Bond length (Å) |       |       |       |       |
|--------------------------------------------------------------------------|-----------------|-------|-------|-------|-------|
|                                                                          | Bi-O            | Bi-Br | Y-O   | Y-Br  | Bi-I  |
| BiOBr                                                                    | 2.347           | 3.220 | /     | /     | /     |
| Bi <sub>0.8</sub> Y <sub>0.2</sub> OBr                                   | 2.316           | 3.306 | 2.291 | 3.118 | /     |
| BiOBr <sub>0.97</sub> I <sub>0.03</sub>                                  | 2.344           | 3.241 | /     | /     | 3.380 |
| Bi <sub>0.8</sub> Y <sub>0.2</sub> OBr <sub>0.97</sub> I <sub>0.03</sub> | 2.342           | 3.255 | 2.305 | 3.092 | 3.369 |

**Table S4** Lattice constant and angle of pristine and doped BiOBr structures.

| Sample                                                                   | Lattice constant (Å) |          |          | Angle (°) |          |          |
|--------------------------------------------------------------------------|----------------------|----------|----------|-----------|----------|----------|
|                                                                          | <i>a</i>             | <i>b</i> | <i>c</i> | <i>α</i>  | <i>β</i> | <i>γ</i> |
| BiOBr                                                                    | 7.89672              | 7.89672  | 9.05605  | 90.00     | 90.00    | 90.00    |
| Bi <sub>0.8</sub> Y <sub>0.2</sub> OBr                                   | 7.89788              | 7.86302  | 8.90773  | 90.00     | 90.00    | 90.00    |
| BiOBr <sub>0.97</sub> I <sub>0.03</sub>                                  | 7.90587              | 7.90375  | 8.96267  | 90.00     | 90.00    | 90.00    |
| Bi <sub>0.8</sub> Y <sub>0.2</sub> OBr <sub>0.97</sub> I <sub>0.03</sub> | 7.88784              | 7.88619  | 8.96776  | 90.02     | 89.99    | 90.01    |

**Table S5** Assignment of main FTIR peaks of PVP K30, pristine and doped BiOBr powders.

| Peak center<br>/cm <sup>-1</sup> | Absorption mode                                |           |                                        |                                                             |                                                                          |
|----------------------------------|------------------------------------------------|-----------|----------------------------------------|-------------------------------------------------------------|--------------------------------------------------------------------------|
|                                  | PVP                                            | Raw BiOBr | Bi <sub>0.8</sub> Y <sub>0.2</sub> OBr | BiOBr <sub>0.97</sub> I <sub>0.03</sub>                     | Bi <sub>0.8</sub> Y <sub>0.2</sub> OBr <sub>0.97</sub> I <sub>0.03</sub> |
| 3700-3000                        |                                                |           |                                        | C=O, Overtone; $\nu_{\text{O-H}}$                           |                                                                          |
| 3427                             | C=O, Overtone                                  |           |                                        |                                                             |                                                                          |
| 2951                             | $\nu_{\text{as -CH}_2}$                        |           |                                        | $\nu_{\text{as -CH}_2}$                                     |                                                                          |
| 2922                             | $\nu_{\text{s -CH}_2}$                         |           |                                        | $\nu_{\text{s -CH}_2}$                                      |                                                                          |
| 2886                             | $\nu_{\text{-CH}}$                             |           |                                        |                                                             |                                                                          |
| 2854                             |                                                |           |                                        | $\nu_{\text{-CH}}$                                          |                                                                          |
| 1652                             | $\nu_{\text{C=O}}, \nu_{\text{C-N}}$           |           |                                        |                                                             |                                                                          |
| 1658-1650                        |                                                |           |                                        | $\nu_{\text{C=O}}, \nu_{\text{C-N}}, \delta_{\text{H-O-H}}$ |                                                                          |
| 1494                             | $\nu_{\text{C-N}}$                             |           |                                        | $\nu_{\text{C-N}}$                                          |                                                                          |
| 1461                             | $\delta_{\text{-CH}_2}$                        |           |                                        | $\delta_{\text{-CH}_2}$                                     |                                                                          |
| 1422                             | $\delta_{\text{-CH}_2}$                        |           |                                        | $\delta_{\text{-CH}_2}$                                     |                                                                          |
| 1372                             | $\gamma_{\text{-CH}}$                          |           |                                        | $\gamma_{\text{-CH}}$                                       |                                                                          |
| 1317                             |                                                |           |                                        |                                                             |                                                                          |
| 1280                             | $\omega_{\text{-CH}_2} \cdot \nu_{\text{C-N}}$ |           |                                        | $\omega_{\text{-CH}_2} \cdot \nu_{\text{C-N}}$              |                                                                          |
| 1238                             |                                                |           |                                        |                                                             |                                                                          |
| 1169                             | $\tau_{\text{-CH}_2}$                          |           |                                        |                                                             |                                                                          |
| 1087                             |                                                |           | Bi-OH                                  |                                                             |                                                                          |
| 1060                             |                                                |           |                                        |                                                             | -O-H...O=C                                                               |
| 1041                             |                                                |           | -O-H...O=C                             |                                                             |                                                                          |
| 1018                             | $\rho_{\text{-CH}_2}$                          |           |                                        |                                                             |                                                                          |
| 884                              |                                                |           |                                        | Bi-O                                                        |                                                                          |
| 845                              | C-C, ring                                      |           |                                        |                                                             |                                                                          |
| 733                              | C-C, chain                                     |           |                                        | C-C, chain                                                  |                                                                          |
| 647                              | $\delta_{\text{N-C=O}}$                        |           |                                        | $\delta_{\text{N-C=O}}$                                     |                                                                          |
| 506                              |                                                |           |                                        | Bi-O                                                        |                                                                          |

**Table S6** Assignment of main FTIR peaks of CR.

| Peak center /cm <sup>-1</sup> | Absorption mode                                                                                 |
|-------------------------------|-------------------------------------------------------------------------------------------------|
| 3466                          | N–H stretching                                                                                  |
| 3076                          | C–H stretching                                                                                  |
| 1582                          | –N=N– stretching                                                                                |
| 1499                          | C–C stretching                                                                                  |
| 1446                          | C=C stretching, aromatic                                                                        |
| 1349                          | C–N bending                                                                                     |
| 1223, 1176, 1057              | C-N stretching (Alkyl),<br>–SO <sub>3</sub> <sup>-</sup> stretching,<br>CH in-plane deformation |
| 832                           | C–C, ring                                                                                       |
| 749                           | CH wagging, ring deformation                                                                    |
| 695, 661, 597                 | –SO <sub>3</sub> <sup>-</sup> bending,<br>N-H out-of-plane deformation,<br>C-H (ring) wagging   |
| 646                           | C–C twisting                                                                                    |

**Table S7** Calculated  $E_{fb}$ ,  $E_{CB}$  and  $E_{VB}$  values of BiOBr samples using Mott-Schottky equation.

| Samples                                                                  | $E_g$<br>(eV) | $x$ -axis<br>intercept | $E_{fb}$<br>V vs Ag/AgCl | $E_{CB}$ (eV) | $E_{VB}$ (eV) |
|--------------------------------------------------------------------------|---------------|------------------------|--------------------------|---------------|---------------|
| BiOBr                                                                    | 2.73          | -0.13                  | -0.16                    | 0.04          | 2.77          |
| Bi <sub>0.8</sub> Y <sub>0.2</sub> OBr                                   | 2.78          | -0.71                  | -0.74                    | -0.54         | 2.24          |
| BiOBr <sub>0.97</sub> I <sub>0.03</sub>                                  | 2.30          | -0.28                  | -0.31                    | -0.11         | 2.19          |
| Bi <sub>0.8</sub> Y <sub>0.2</sub> OBr <sub>0.97</sub> I <sub>0.03</sub> | 2.38          | -0.55                  | -0.58                    | -0.38         | 2.0           |

**Table S8.** DFT calculated band structural results of pure and doped BiOBr flakes.

| Sample                                                          | DFT          |          |                  |                  |
|-----------------------------------------------------------------|--------------|----------|------------------|------------------|
|                                                                 | Fermi Energy | Band gap | $W_{\text{VBM}}$ | $W_{\text{CBM}}$ |
| BiOBr                                                           | 2.74         | 2.32     | 2.30             | -0.0163          |
| $\text{Bi}_{0.8}\text{Y}_{0.2}\text{OBr}$                       | 2.75         | 2.41     | 2.40             | -0.0192          |
| $\text{BiOBr}_{0.97}\text{I}_{0.03}$                            | 3.005        | 2.25     | 2.219            | -0.0285          |
| $\text{Bi}_{0.8}\text{Y}_{0.2}\text{OBr}_{0.97}\text{I}_{0.03}$ | 3.712        | 2.29     | 2.281            | -0.0084          |

**Table S9.** Adsorption efficiency, photodegradation efficiency, first-order kinetic parameters for different samples (initial CR concentration: 50 mg L<sup>-1</sup>, CR solution: 50 mL, pH: 6, and catalyst dosage: 25 mg).

| Samples                                                                  | Adsorption efficiency (%) | Adsorption+ Photodegradation efficiency (%) | <i>k</i> (min <sup>-1</sup> ) | <i>R</i> <sup>2</sup> |
|--------------------------------------------------------------------------|---------------------------|---------------------------------------------|-------------------------------|-----------------------|
| BiOBr                                                                    | 10.60                     | 46.51                                       | 0.00637                       | 0.99882               |
| Bi <sub>0.95</sub> Y <sub>0.05</sub> OBr                                 | 20.40                     | 82.55                                       | 0.01945                       | 0.99744               |
| Bi <sub>0.9</sub> Y <sub>0.1</sub> OBr                                   | 28.52                     | 86.91                                       | 0.02209                       | 0.94075               |
| Bi <sub>0.85</sub> Y <sub>0.15</sub> OBr                                 | 25.64                     | 86.98                                       | 0.02246                       | 0.98043               |
| Bi <sub>0.8</sub> Y <sub>0.2</sub> OBr                                   | 31.21                     | 90.87                                       | 0.02444                       | 0.91122               |
| Bi <sub>0.75</sub> Y <sub>0.25</sub> OBr                                 | 26.04                     | 86.11                                       | 0.02117                       | 0.98468               |
| Bi <sub>0.7</sub> Y <sub>0.3</sub> OBr                                   | 30.40                     | 89.66                                       | 0.02374                       | 0.92754               |
| BiOBr <sub>0.99</sub> I <sub>0.01</sub>                                  | 16.91                     | 71.21                                       | 0.01329                       | 0.99926               |
| BiOBr <sub>0.98</sub> I <sub>0.02</sub>                                  | 14.56                     | 71.48                                       | 0.01373                       | 0.99823               |
| BiOBr <sub>0.97</sub> I <sub>0.03</sub>                                  | 15.17                     | 76.64                                       | 0.0162                        | 0.999                 |
| BiOBr <sub>0.96</sub> I <sub>0.04</sub>                                  | 14.77                     | 67.72                                       | 0.01217                       | 0.99966               |
| BiOBr <sub>0.95</sub> I <sub>0.05</sub>                                  | 14.56                     | 75.44                                       | 0.01568                       | 0.99883               |
| BiOBr <sub>0.9</sub> I <sub>0.1</sub>                                    | 16.11                     | 80.00                                       | 0.01817                       | 0.99658               |
| Bi <sub>0.8</sub> Y <sub>0.2</sub> OBr <sub>0.99</sub> I <sub>0.01</sub> | 28.99                     | 84.77                                       | 0.02005                       | 0.99967               |
| Bi <sub>0.8</sub> Y <sub>0.2</sub> OBr <sub>0.98</sub> I <sub>0.02</sub> | 57.65                     | 90.47                                       | 0.01997                       | 0.99295               |
| Bi <sub>0.8</sub> Y <sub>0.2</sub> OBr <sub>0.97</sub> I <sub>0.03</sub> | 75.71                     | 98.19                                       | 0.03653                       | 0.98115               |
| Bi <sub>0.8</sub> Y <sub>0.2</sub> OBr <sub>0.96</sub> I <sub>0.04</sub> | 75.77                     | 97.85                                       | 0.03497                       | 0.99499               |
| Bi <sub>0.8</sub> Y <sub>0.2</sub> OBr <sub>0.95</sub> I <sub>0.05</sub> | 65.44                     | 97.11                                       | 0.03629                       | 0.99603               |
| Bi <sub>0.8</sub> Y <sub>0.2</sub> OBr <sub>0.9</sub> I <sub>0.1</sub>   | 82.01                     | 97.85                                       | 0.03019                       | 0.97519               |



**Table S10.** TOC removal performance of  $\text{Bi}_{0.8}\text{Y}_{0.2}\text{OBr}_{0.97}\text{I}_{0.03}$  for the degradation of CR

| <b>TOC of initial CR solution<br/>(mg L<sup>-1</sup>)</b> | <b>TOC of CR solution after 80<br/>min degradation (mg L<sup>-1</sup>)</b> | <b>TOC removal efficiency<br/>(%)</b> |
|-----------------------------------------------------------|----------------------------------------------------------------------------|---------------------------------------|
| 11.07                                                     | 5.40                                                                       | 51.22                                 |

**Table S11.** Adsorption efficiency, photodegradation efficiency, first-order kinetic parameters for different samples (initial CR concentration: 100 mg L<sup>-1</sup>, CR solution: 50 mL, pH: 6, and catalyst dosage: 25 mg).

| Samples                                                                  | Adsorption efficiency (%) | Adsorption+ Photodegradation efficiency (%) | <i>k</i> (min <sup>-1</sup> ) | <i>R</i> <sup>2</sup> |
|--------------------------------------------------------------------------|---------------------------|---------------------------------------------|-------------------------------|-----------------------|
| Bi <sub>0.8</sub> Y <sub>0.2</sub> OBr                                   | 14.28                     | 62.24                                       | 0.01011                       | 0.9997                |
| Bi <sub>0.8</sub> Y <sub>0.2</sub> OBr <sub>0.99</sub> I <sub>0.01</sub> | 15.45                     | 54.28                                       | 0.0077                        | 0.99973               |
| Bi <sub>0.8</sub> Y <sub>0.2</sub> OBr <sub>0.98</sub> I <sub>0.02</sub> | 26.97                     | 84.38                                       | 0.01978                       | 0.99752               |
| Bi <sub>0.8</sub> Y <sub>0.2</sub> OBr <sub>0.97</sub> I <sub>0.03</sub> | 37.07                     | 92.62                                       | 0.0278                        | 0.99472               |
| Bi <sub>0.8</sub> Y <sub>0.2</sub> OBr <sub>0.96</sub> I <sub>0.04</sub> | 38.72                     | 91.41                                       | 0.02582                       | 0.99591               |
| Bi <sub>0.8</sub> Y <sub>0.2</sub> OBr <sub>0.95</sub> I <sub>0.05</sub> | 35.07                     | 88.38                                       | 0.02237                       | 0.99415               |
| Bi <sub>0.8</sub> Y <sub>0.2</sub> OBr <sub>0.9</sub> I <sub>0.1</sub>   | 49.31                     | 92.07                                       | 0.02494                       | 0.9752                |
